# Supplementary material for: Comparative evaluation of the effect of two pulpal medicaments on pain and bleeding status of mandibular molars with irreversible pulpitis post-failure of inferior alveolar nerve block: a double-blind, randomized, clinical trial
Source: PeerJ. 2022 May 13;10:e13397. doi: 10.7717/peerj.13397 (PMC9109695; doi:10.7717/peerj.13397)
Supplement: Supplemental Information 2 [file peerj-10-13397-s002.xlsx]

## Sheet: Sheet1
			1st SITTING VAS						2nd SITTING VAS
Sl no.	Age/sex	tooth no.	PO	LA	EX	BS1	2nd sitting	Medications taken	AO	CI	BS2	Site of exposure	Extent of deroofing
												O
1	45/F	46\C	144mm/severe	85mm/moderate	114mm/severe	1	After 48 hrs	not taken	23mm/mild	69.5mm/moderate	0	occlusal	before partial deroofing
2	29/M	46\C	114mm/severe	54mm/mild	85mm/moderate	2	After 48 hrs	not taken	0	0	0	mesio-occlusal	after partial deroofing
3	35/F	36\D	114mm/severe	54mm/mild	85mm/moderate	2	After 24hrs	not taken	0	0	0	O	after partial deroofing
4	22/F	47\C	144mm/severe	54mm/mild	85mm/moderate	2	After 24hrs	not taken	0	0	0	disto-occlusal	after partial deroofing
5	27/M	37\D	144mm/severe	85mm/moderate	114mm/severe	2	After 24hrs	not taken	23mm/mild	42mm/mild	0	DO	before partial deroofing
6	32/M	36\D	144mm/severe	54mm/mild	85mm/moderate	2	After 48 hrs	not taken	0	0	0	O	after partial deroofing
7	21/F	46\D	144mm/severe	54mm/mild	85mm/moderate	2	After 24hrs	not taken	36mm/mild	7.6mm/mild	0.6	O	after partial deroofing
8	30/M	46\C	114mm/severe	54mm/mild	85mm/moderate	2	After 24hrs	not taken	0	0	0.6	DO	after partial deroofing
9	25/M	47\D	114mm/severe	54mm/mild	85mm/moderate	2	After 24hrs	not taken	0	0	0	O	after partial deroofing
10	35/F	36\C	114mm/severe	54mm/mild	85mm/moderate	2	After 24hrs	not taken	23mm/mild	38.5mm/mild	0.5	MO	after partial deroofing
11	41/M	37\D	114mm/severe	54mm/mild	85mm/moderate	2	After 24hrs	not taken	0	0	0	O	after complete deroofing
12	23/M	36\D	144mm/severe	85mm/moderate	114mm/severe	2	After 48 hrs	not taken	0	0	0	O	before partial deroofing
13	29/F	36\C	170mm/severe	85mm/moderate	85mm/moderate	2	After 24hrs	not taken	36mm/mild	42mm/mild	0	MO	after partial deroofing
14	38/M	47\C	114mm/severe	54mm/mild	85mm/moderate	2	After 24hrs	not taken	0	0	0	O	after complete deroofing
15	27/F	36\D	114mm/severe	36mm/mild	85mm/moderate	2	After 24hrs	not taken	0	0	0	DO	after partial deroofing
16	25/F	37\D	114mm/severe	23mm/mild	114mm/severe	2	After 48 hrs	not taken	0	0	0	DO	before partial deroofing
17	40/M	46\C	114mm/severe	23mm/mild	85mm/moderate	2	After 48 hrs	not taken	0	0	0	O	after partial deroofing
18	47/M	47\C	144mm/severe	54mm/mild	85mm/moderate	2	After 24hrs	not taken	0	0	0	O	after complete deroofing
19	26/F	37\D	170mm/severe	54mm/mild	114mm/severe	2	After 24hrs	not taken	36mm/mild	36mm/mild	0.3	DO	before partial deroofing
20	40/M	37\C	144mm/severe	36mm/mild	54mm/mild	2	After 48 hrs	not taken	0	0	0	0	after complete deroofing
21	27/M	47\C	114mm/severe	23mm/mild	85mm/moderate	2	After 24hrs	not taken	0	0	0	O	after partial deroofing
22	47/M	46\D	144mm/severe	54mm/mild	85mm/moderate	1	After 24hrs	not taken	0	0	0	DO	after partial deroofing
23	25/M	37\D	114mm/severe	54mm/mild	85mm/moderate	2	After 24hrs	not taken	0	0	0	O	after partial deroofing
24	35/F	46\C	114mm/severe	54mm/mild	85mm/moderate	2	After 24hrs	not taken	23mm/mild	38.5mm/mild	0.5	MO	after partial deroofing
25	41/M	47\C	114mm/severe	54mm/mild	85mm/moderate	2	After 24hrs	not taken	0	0	0	O	after complete deroofing
26	23/M	46\C	144mm/severe	85mm/moderate	114mm/severe	2	After 48 hrs	not taken	0	0	0	O	before partial deroofing
27	29/F	36\D	170mm/severe	85mm/moderate	85mm/moderate	2	After 24hrs	not taken	36mm/mild	42mm/mild	0	MO	after partial deroofing
28	38/M	37\D	114mm/severe	54mm/mild	85mm/moderate	2	After 24hrs	not taken	0	0	0	O	after complete deroofing
29	29/F	36\C	170mm/severe	85mm/moderate	85mm/moderate	2	After 24hrs	not taken	36mm/mild	42mm/mild	0	MO	after partial deroofing
30	38/M	47\D	114mm/severe	54mm/mild	85mm/moderate	2	After 24hrs	not taken	0	0	0	O	after complete deroofing
31	29/F	37\C	170mm/Severe	23mm/mild	114mm/severe	2	After 48 hrs	not taken	0	0	0	O	before partial deroofing
32	45/M	37\C	144mm/severe	54mm/mild	54mm/mild	2	After 24hrs	not taken	0	0	0	O	after complete deroofing
33	30/M	36\D	114mm/severe	23mm/mild	85mm/moderate	2	After 48 hrs	not taken	0	0	0	O	after partial deroofing
34	25/F	37\D	144mm/severe	54mm/mild	85mm/moderate	2	After 24hrs	not taken	0	0	0	O	after complete deroofing
35	28/M	36\D	170mm/severe	54mm/mild	114mm/severe	2	After 24hrs	not taken	36mm/mild	36mm/mild	0.3	DO	before partial deroofing
36	40/M	47\C	144mm/severe	36mm/mild	54mm/mild	2	After 48 hrs	not taken	0	0	0	0	after complete deroofing
37	53/M	46\C	144mm/severe	23mm/mild	114mm/severe	2	After 48 hrs	not taken	0	0	0	DO	before partial deroofing
38	25/F	46\D	170mm/Severe	23mm/mild	85mm/moderate	2	After 24hrs	not taken	0	64mm/moderate	0.3	DO	after partial deroofing
39	41/M	47\C	114mm/severe	54mm/mild	85mm/moderate	2	After 24hrs	not taken	0	0	0	O	after complete deroofing
40	29/F	36\D	170mm/severe	85mm/moderate	85mm/moderate	2	After 24hrs	not taken	36mm/mild	42mm/mild	0	MO	after partial deroofing
41	45/F	46\C	144mm/severe	85mm/moderate	114mm/severe	2	After 24hrs	not taken	23mm/mild	69.5mm/moderate	0	O	before partial deroofing
42	29/M	46\C	114mm/severe	54mm/mild	85mm/moderate	2	After 48 hrs	not taken	0	0	0	MO	after partial deroofing
43	21/F	46\D	144mm/severe	54mm/mild	85mm/moderate	2	After 24hrs	not taken	36mm/mild	7.6mm/mild	0.6	O	after partial deroofing
44	30/M	46\C	114mm/severe	54mm/mild	85mm/moderate	2	After 24hrs	not taken	0	0	0.6	DO	after partial deroofing
45	27/F	36\D	114mm/severe	36mm/mild	85mm/moderate	2	After 24hrs	not taken	0	0	0	DO	after partial deroofing
46	25/F	37\D	114mm/severe	23mm/mild	114mm/severe	2	After 48 hrs	not taken	0	0	0	DO	before partial deroofing
47	27/M	47\C	114mm/severe	23mm/mild	85mm/moderate	2	After 24hrs	not taken	0	0	0	O	after partial deroofing
48	47/M	46\D	144mm/severe	54mm/mild	85mm/moderate	2	After 24hrs	not taken	0	0	0	DO	after partial deroofing
49	29/F	37\C	170mm/Severe	23mm/mild	114mm/severe	2	After 48 hrs	not taken	0	0	0	O	before partial deroofing
50	45/M	37\C	144mm/severe	54mm/mild	54mm/mild	2	After 24hrs	not taken	0	0	0	O	after complete deroofing
51	53/M	46\C	144mm/severe	23mm/mild	114mm/severe	2	After 48 hrs	not taken	0	0	0	DO	before partial deroofing
52	25/F	46\C	170mm/Severe	23mm/mild	85mm/moderate	2	After 24hrs	not taken	0	64mm/moderate	0.3	DO	after partial deroofing
53	19/F	46\D	144mm/severe	36mm/mild	114mm/severe	2	After 24hrs	not taken	0	69mm/moderate	0.5	MO	before partial deroofing
54	28/F	47\D	144mm/severe	54mm/mild	54mm/mild	2	After 24hrs	not taken	0	0	0	B	after complete deroofing
55	27/M	47\D	144mm/severe	36mm/mild	85mm/moderate	2	After 24hrs	not taken	0	57	1	O	after partial deroofing
56	34/F	37\C	144mm/severe	36mm/mild	54mm/mild	2	After 24hrs	not taken	0	0	0	O	after complete deroofing
57	48/M	37\C	144mm/severe	54mm/mild	85mm/moderate	2	After 24hrs	not taken	0	18mm/mild	0.3	MO	after partial deroofing
58	46/M	46\C	144mm/severe	85mm/moderate	144mm/severe	2	After 24hrs	not taken	0	0	0	O	before partial deroofing
59	33/M	47\D	144mm/severe	54mm/mild	85mm/moderate	2	After 24hrs	not taken	0	0	0	O	after partial deroofing
60	25/M	37\C	144mm/severe	85mm/moderate	85mm/moderate	2	After 48 hrs	not taken	0	0	0	MO	after partial deroofing
